# Supplementary material for: Polyphenol-modified nanovesicles for synergistically enhanced in vitro tumor cell targeting and apoptosis
Source: Royal Society of Chemistry journal article supplement (doi:10.1039/d1tb02509k), 2022-01-01
Supplement: d1tb02509k1.pdf [file d1tb02509k1.pdf]

Electronic Supporting Information

## Polyphenol-modified Nanovesicles for Synergistically Enhanced *in vitro* Tumor Cell Targeting and Apoptosis

Jihye Seo <sup>a</sup>, Seulgi Kim <sup>a</sup>, Yousong Lee <sup>a</sup>, Jiwon Kim <sup>c</sup>, Youngbok Lee <sup>c,\*</sup>, Mikyung Shin <sup>b,\*</sup>,  
Jin Woong Kim <sup>a,\*</sup>

<sup>a</sup> School of Chemical Engineering, Sungkyunkwan University, Suwon 16149, Republic of Korea.

<sup>b</sup> Department of Intelligent Precision Healthcare Convergence, Sungkyunkwan University, Suwon 16419, Republic of Korea.

<sup>c</sup> Department of Applied Chemistry and Center for Bionano Intelligence Education and Research, Hanyang University, Ansan 15588, Republic of Korea.

\*Corresponding Author

Prof. Youngbok Lee; Tel: +82 31 400 5500; E-mail: yblee@hanyang.ac.kr

Prof. Mikyung Shin; Tel: +82 31 299 4344; E-mail: mikyungshin@g.skku.edu

Prof. Jin Woong Kim; Tel: +82 31 290 7346; E-mail: jinwoongkim@skku.edu

## Supplementary data

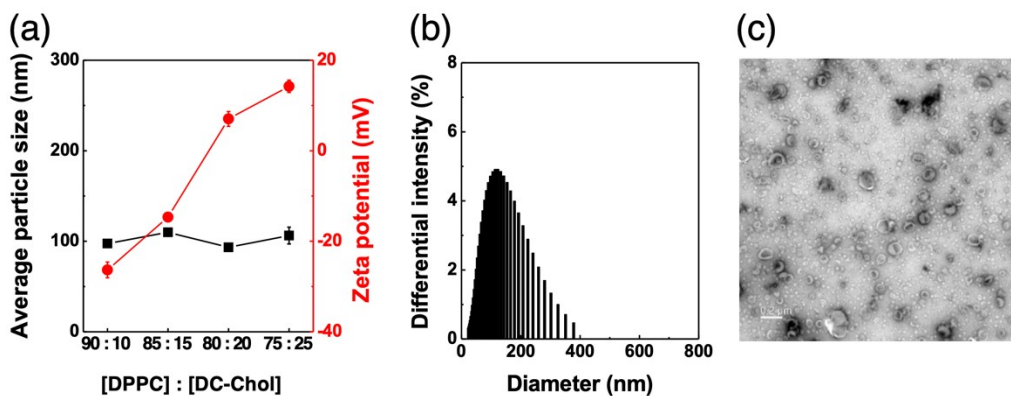

**Figure S1.** (a) Size and zeta potential of NVs varying with stoichiometric ratio of DPPC/DC-Cholesterol. (b) Hydrodynamic diameters of the NVs. (c) TEM image of NVs.

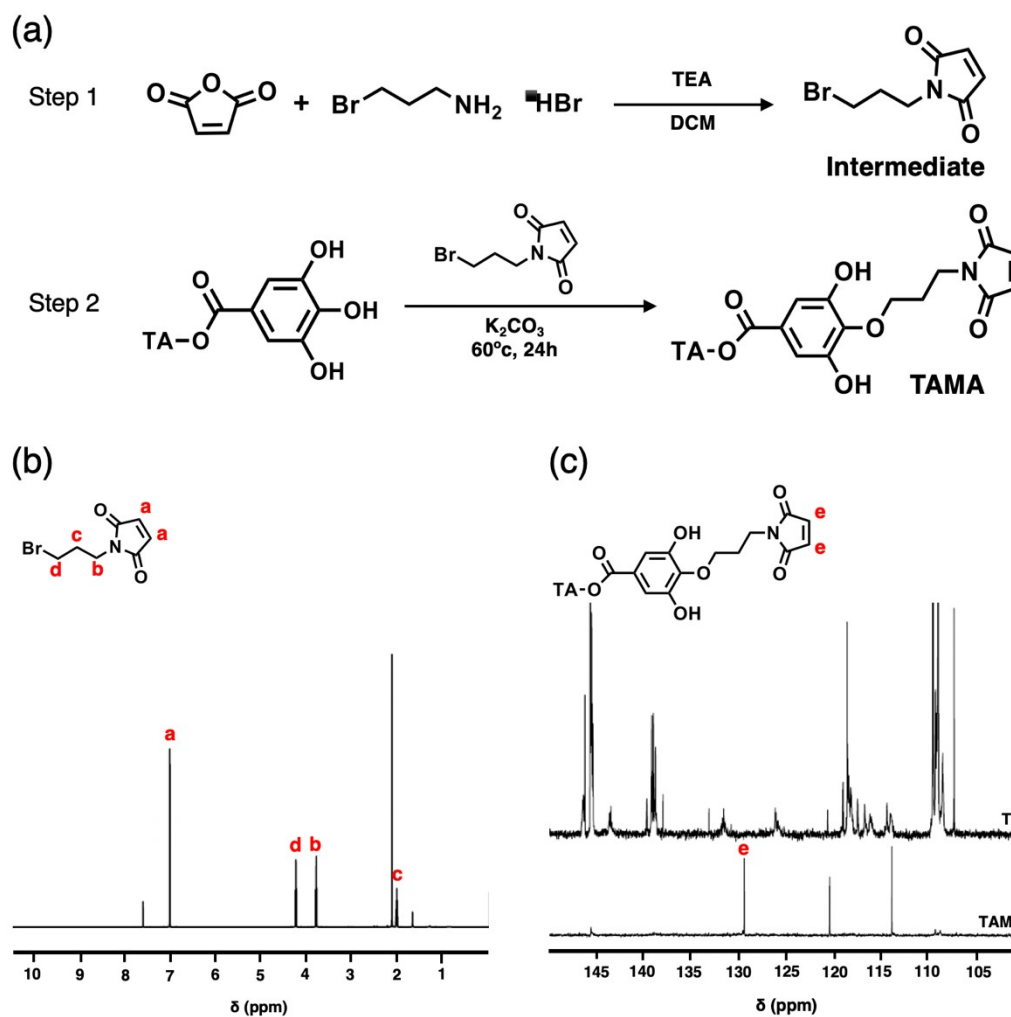

**Figure S2.** (a) Synthesis of TAMA. (b) <sup>1</sup>H NMR of N-3-bromopropylmaleimide. (c) <sup>13</sup>C NMR of TA and TAMA.

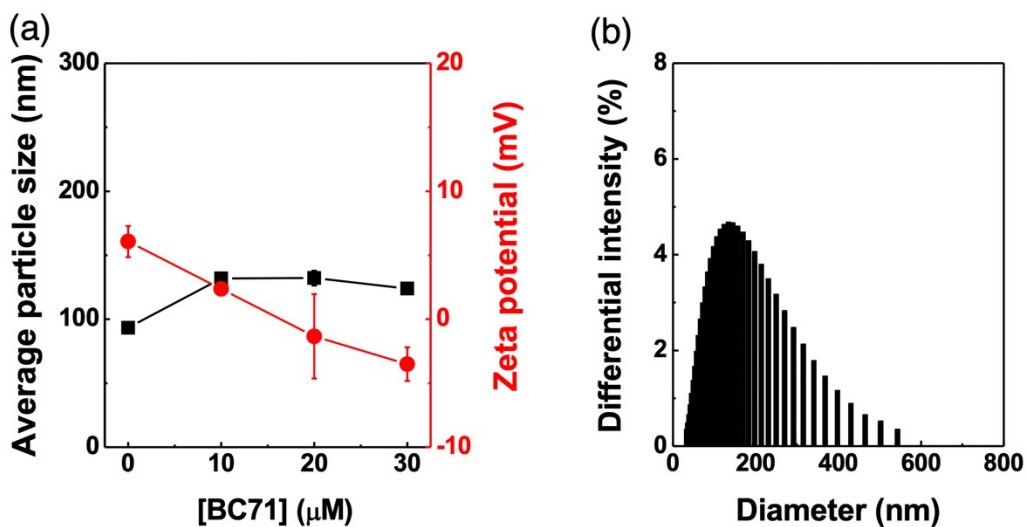

**Figure S3.** (a) Size and zeta potential of  $NV_{BC71}$  varying with the concentration of BC71. (b) Hydrodynamic diameter of  $NV_{BC71-30 \mu M}$ .

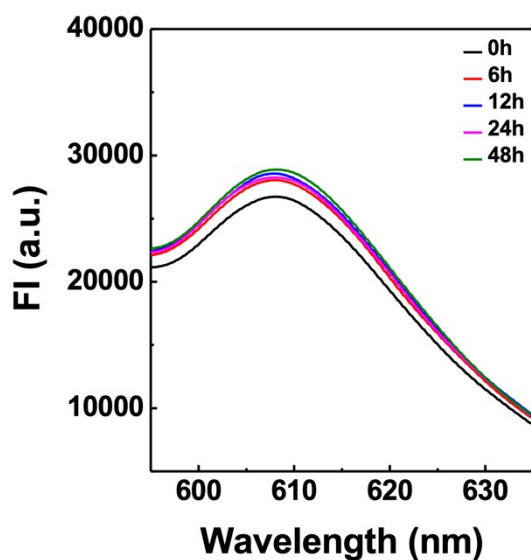

**Figure S4.** Fluorescence spectra of Texas red DHPE-loaded  $TANV_{BC71}$  after incubation with FBS/PBS (1/9, v/v) as a function of time.

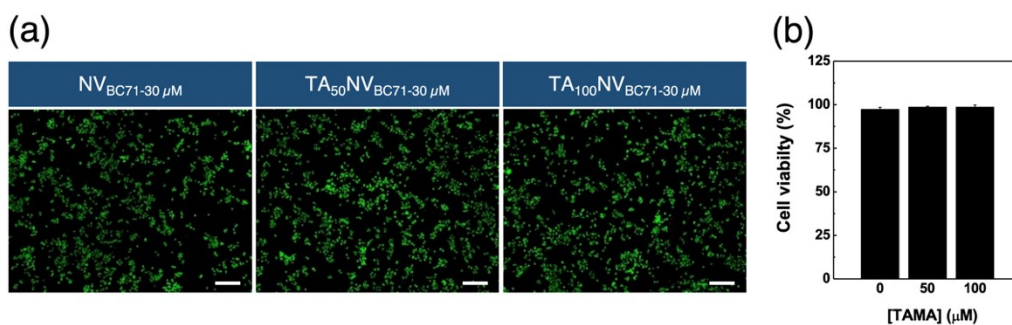

**Figure S5.** (a) Fluorescence images of HaCaT cells treated with  $NV_{BC71-30 \mu M}$ ,  $TA_{50}NV_{BC71-30 \mu M}$  and  $TA_{100}NV_{BC71-30 \mu M}$ . The scale bar is 50  $\mu m$ . (b) Cell viability (HaCaT) after treatment of  $NV_{BC71-30 \mu M}$ ,  $TA_{50}NV_{BC71-30 \mu M}$  or  $TA_{100}NV_{BC71-30 \mu M}$  through live/dead fluorescence image analysis.

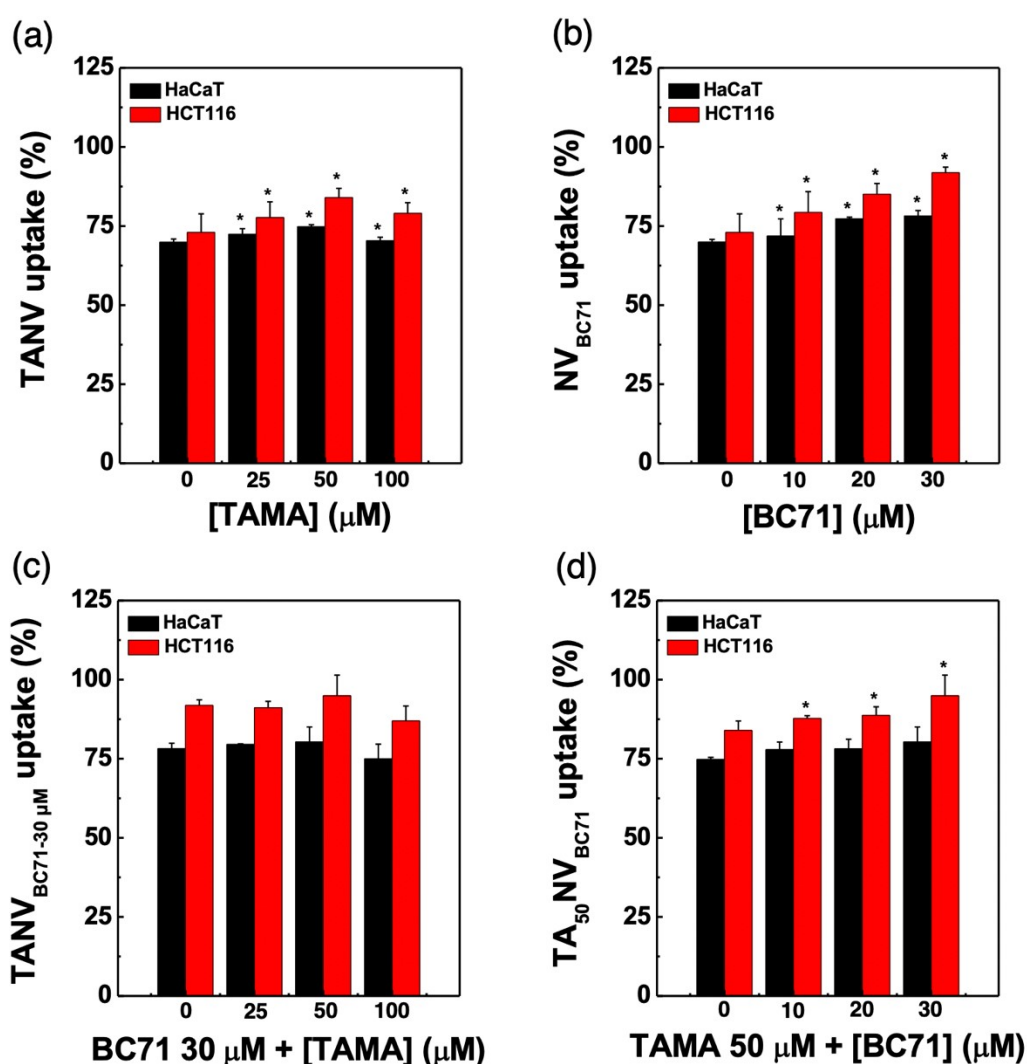

**Figure S6.** Quantitative cellular uptake of (a) TANVs with varying the concentration of conjugated TAMA (\* $p < 0.05$  compared to treated NVs), (b)  $NV_{BC71}$  with varying the concentration of BC71 (\* $p < 0.05$  compared to treated NVs), (c)  $TANV_{BC71-30 \mu M}$  with varying the concentration of TAMA (\* $p < 0.05$  compared to treated  $NV_{BC71-30 \mu M}$ ), and (d)  $TA_{50}NV_{BC71}$  with varying the concentration of BC71 (\* $p < 0.05$  compared to treated  $TA_{50}NV$ s). HaCaT cells (black) and HCT116 cells (red) were used.
